# Supplementary material for: A rotational spectroscopy study of microsolvation effects on intramolecular proton transfer in trifluoroacetylacetone–(H2O)1–3
Source: Royal Society of Chemistry journal article supplement (doi:10.1039/d4cp01061b), 2024-01-01
Supplement: d4cp01061b1.pdf [file d4cp01061b1.pdf]

## Supporting Information

### Rotational Spectroscopy Study of Microsolvation Effects on Intramolecular Proton Transfer in Trifluoroacetylacetonate-(H<sub>2</sub>O)<sub>1-3</sub>

Dingding Lv,<sup>1</sup> Xinlei Chen,<sup>1</sup> Ningjing Jiang,<sup>1</sup> Guanjun Wang,<sup>1</sup> Xiaoqing Zeng,<sup>1</sup> Wei Fang,<sup>1\*</sup> Weixing Li,<sup>1\*</sup> Mingfei Zhou<sup>1\*</sup>

<sup>1</sup>Department of Chemistry, Collaborative Innovation Center of Chemistry for Energy Materials, Shanghai Key Laboratory of Molecular Catalysis and Innovative Materials, Fudan University, Songhu Rd. 2005, 200438 Shanghai, China.

\*Corresponding authors: \* [wei\\_fang@fudan.edu.cn](mailto:wei_fang@fudan.edu.cn); [weixingli@fudan.edu.cn](mailto:weixingli@fudan.edu.cn); [mfzhou@fudan.edu.cn](mailto:mfzhou@fudan.edu.cn)

## Details of ring-polymer instanton theory calculations

Instanton theory calculations were performed for the  $\text{enol}_H\text{-1W}_{CH}$  to  $\text{enol}_F\text{-1W}_{CF}$  transition as an example to evaluate the importance of quantum tunneling for the transition between the  $\text{enol}_H$  and  $\text{enol}_F$  conformers. In specific, we performed thermalized microcanonical instanton theory<sup>1, 2</sup> calculations using the instanton program developed by Prof. Jeremy O. Richardson's group, combined with on-the-fly *ab initio* calculations at the B3LYP-D3/def2-TZVP level performed with Gaussian09<sup>3</sup>. 5 instantons were optimized at 200K, 150K, 120K, 100K, and 80K respectively, and the rates were obtained by combing contributions from all the instantons using the procedure described in Ref.2. 48 beads were used at 200K and an increasing number of beads up to 128 were used for lower temperatures. We have checked that the results are converged with respect to the number of beads. Additionally, we accounted for anharmonicity in the reactive mode (i.e. the stretching of OH bond) using 2<sup>nd</sup> order vibrational perturbation theory<sup>4</sup>.

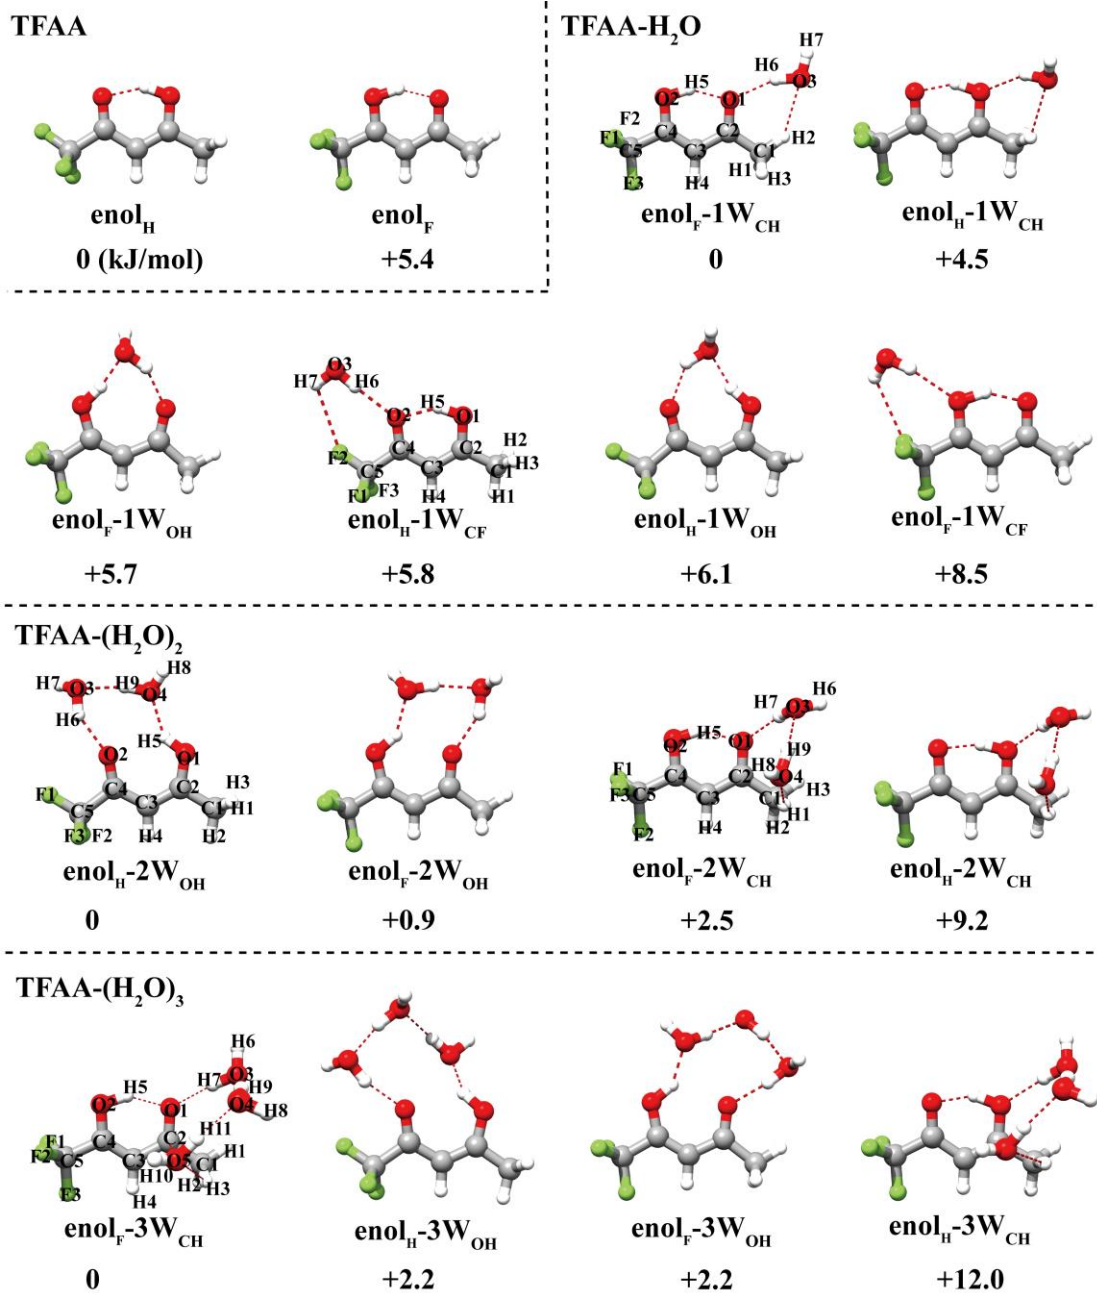

**Figure S1.** Optimized (B3LYP-D4/def2-TZVP) structures of TFAA-(H<sub>2</sub>O)<sub>n</sub> (n=0,1,2,3). The relative energies (in kJ mol<sup>-1</sup>) calculated at DLPNO-CCSD(T)/def2-TZVP//B3LYP-D4/def2-TZVP are also listed.

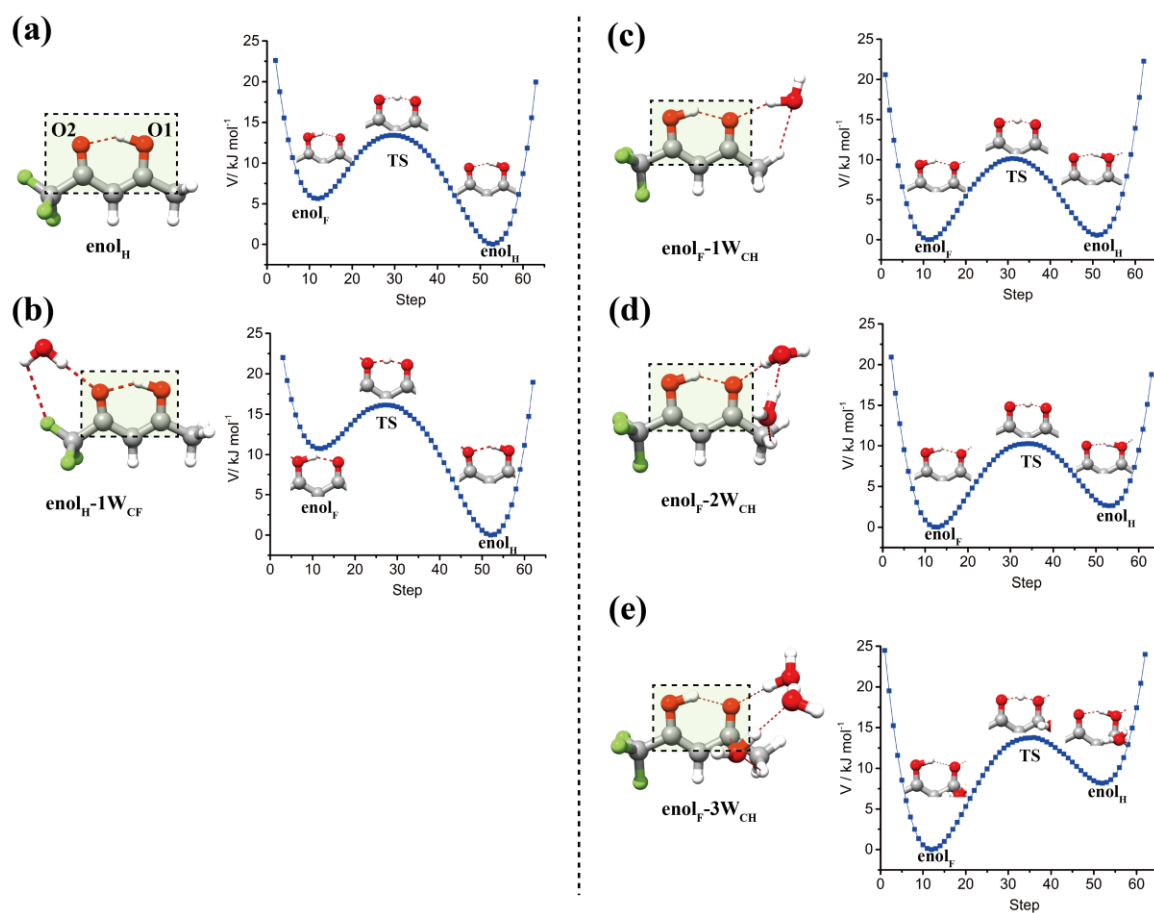

**Figure S2.** The relaxed potential energy surface analysis for the TFAA monomer and the observed complexes of TFAA-(H<sub>2</sub>O)<sub>1-3</sub>. Relaxed energy scans by simultaneously changing the O-H-O distances in TFAA on a regular grid with a step of 0.01 Å that results in proton transfer process.

**Table S1.** Calculated spectroscopic parameters, dipole moment components and relative energies for TFAA-(H<sub>2</sub>O)<sub>n</sub> (n=1,2,3) complexes. The resulting conformers were optimized at the B3LYP-D4/def2-TZVP level of theory and their single-point energies were evaluated at the DLPNO-CCSD(T)/def2-TZVP level.

|                                      |                                     | $\Delta\bar{E}_{+ZPE+BSSE}$<br>kJ mol <sup>-1</sup> | <i>A</i> / MHz | <i>B</i> / MHz | <i>C</i> / MHz | $ \mu_a $<br>/D | $ \mu_b $<br>/D | $ \mu_c $<br>/D |
|--------------------------------------|-------------------------------------|-----------------------------------------------------|----------------|----------------|----------------|-----------------|-----------------|-----------------|
| TFAA-H <sub>2</sub> O                | enol <sub>F</sub> -1W <sub>CH</sub> | 0.0                                                 | 2446.2         | 439.7          | 400.0          | 0.4             | 1.2             | 0.0             |
|                                      | enol <sub>H</sub> -1W <sub>CH</sub> | 4.5                                                 | 2243.2         | 450.6          | 417.5          | 2.2             | 1.1             | 0.6             |
|                                      | enol <sub>F</sub> -1W <sub>OH</sub> | 5.7                                                 | 1393.0         | 667.4          | 492.8          | 2.4             | 1.5             | 1.1             |
|                                      | enol <sub>H</sub> -1W <sub>CF</sub> | 5.8                                                 | 1277.8         | 664.7          | 475.5          | 4.6             | 3.8             | 0.3             |
|                                      | enol <sub>H</sub> -1W <sub>OH</sub> | 6.1                                                 | 1389.4         | 654.3          | 485.4          | 2.5             | 1.3             | 1.1             |
|                                      | enol <sub>F</sub> -1W <sub>CF</sub> | 8.5                                                 | 1467.5         | 637.0          | 484.2          | 4.4             | 3.7             | 0.8             |
| TFAA-(H <sub>2</sub> O) <sub>2</sub> | enol <sub>H</sub> -2W <sub>OH</sub> | 0.0                                                 | 809.1          | 630.1          | 380.9          | 1.5             | 1.6             | 1.0             |
|                                      | enol <sub>F</sub> -2W <sub>OH</sub> | 0.9                                                 | 1204.2         | 451.1          | 350.4          | 2.3             | 2.5             | 0.3             |
|                                      | enol <sub>F</sub> -2W <sub>CH</sub> | 2.5                                                 | 1443.6         | 373.5          | 365.4          | 2.0             | 1.3             | 1.6             |
|                                      | enol <sub>H</sub> -2W <sub>CH</sub> | 9.2                                                 | 1530.1         | 334.0          | 318.4          | 2.4             | 0.8             | 1.7             |
| TFAA-(H <sub>2</sub> O) <sub>3</sub> | enol <sub>F</sub> -3W <sub>CH</sub> | 0.0                                                 | 1171.1         | 304.0          | 293.3          | 2.3             | 1.0             | 1.2             |
|                                      | enol <sub>H</sub> -3W <sub>OH</sub> | 2.2                                                 | 607.3          | 530.2          | 305.9          | 0.2             | -2.7            | 0.1             |
|                                      | enol <sub>F</sub> -3W <sub>OH</sub> | 2.2                                                 | 1026.8         | 329.6          | 266.0          | 1.5             | 2.3             | 0.5             |
|                                      | enol <sub>H</sub> -3W <sub>CH</sub> | 12.0                                                | 1220.9         | 280.1          | 272.7          | 3.3             | 1.4             | 1.6             |

**Table S2.** Experimental spectroscopic parameters of the H<sub>2</sub><sup>18</sup>O and deuterated isotopologues of enol<sub>F</sub>-1W<sub>CH</sub>.

|                                         | <sup>18</sup> O-3          | D-5         | D-6         | D-7         |
|-----------------------------------------|----------------------------|-------------|-------------|-------------|
| <i>A</i> / MHz                          | 2419.504(6) <sup>[a]</sup> | 2402.884(2) | 2419.377(7) | 2408.293(1) |
| <i>B</i> / MHz                          | 418.2496(6)                | 435.6431(4) | 430.464(1)  | 425.2398(2) |
| <i>C</i> / MHz                          | 381.5805(7)                | 395.5708(4) | 391.7083(6) | 387.1213(2) |
| <i>D<sub>J</sub></i> / kHz              | -0.011(5)                  | -0.011(3)   |             |             |
| <i>P<sub>cc</sub></i> / uÅ <sup>2</sup> | 46.380(2)                  | 46.40(1)    | 46.37(2)    | 46.413(7)   |
| <i>N</i> <sup>[b]</sup>                 | 26                         | 41          | 11          | 54          |
| <i>σ</i> <sup>[c]</sup> / kHz           | 2.67                       | 6.08        | 7.29        | 8.65        |

[a] Error in parentheses in units of the last digit.

[b] Number of lines in the fit.

[c] Standard deviation of the fit.

**Table S3.** Experimental spectroscopic parameters of the H<sub>2</sub><sup>18</sup>O and deuterated isotopologues of enol<sub>H</sub>-1W<sub>CF</sub>.

|                                         | <sup>18</sup> O-3         |
|-----------------------------------------|---------------------------|
| <i>A</i> / MHz                          | 1221.42(1) <sup>[a]</sup> |
| <i>B</i> / MHz                          | 657.0451(5)               |
| <i>C</i> / MHz                          | 463.677(1)                |
| <i>D<sub>J</sub></i> / kHz              | 0.031(8)                  |
| <i>P<sub>cc</sub></i> / uÅ <sup>2</sup> | 46.496(7)                 |
| <i>N</i> <sup>[b]</sup>                 | 14                        |
| <i>σ</i> <sup>[c]</sup> / kHz           | 5.03                      |

[a] Error in parentheses in units of the last digit.

[b] Number of lines in the fit.

[c] Standard deviation of the fit.

**Table S4.** Experimental spectroscopic parameters of the H<sub>2</sub><sup>18</sup>O and deuterated isotopologue of enol<sub>H</sub>-2W<sub>OH</sub>.

|                                         | <sup>18</sup> O-3       | <sup>18</sup> O-4 | D-5         | D-6        | D-7        | D-8        | D-9         |
|-----------------------------------------|-------------------------|-------------------|-------------|------------|------------|------------|-------------|
| <i>A</i> / MHz                          | 757.0(3) <sup>[a]</sup> | 779.239(2)        | 785.88(6)   | 777.95(4)  | 765.3(1)   | 782.3(5)   | 779.5(2)    |
| <i>B</i> / MHz                          | 639.2(2)                | 625.65(2)         | 636.76(3)   | 640.25(3)  | 640.4(1)   | 628.3(3)   | 635.2(1)    |
| <i>C</i> / MHz                          | 370.4095(8)             | 370.988(2)        | 376.3213(8) | 375.752(2) | 372.952(1) | 372.644(1) | 374.3797(8) |
| <i>D<sub>J</sub></i> / kHz              |                         | -0.023(7)         |             | -0.015(7)  |            |            |             |
| <i>P<sub>cc</sub></i> / uÅ <sup>2</sup> | 46.9(3)                 | 47.0(1)           | 46.90(4)    | 47.00(4)   | 47.2(1)    | 47.1(4)    | 47.0(1)     |
| <i>N</i> <sup>[b]</sup>                 | 17                      | 24                | 18          | 22         | 13         | 16         | 18          |
| <i>σ</i> <sup>[c]</sup> / kHz           | 6.96                    | 6.57              | 5.10        | 5.71       | 5.30       | 5.29       | 6.05        |

[a] Error in parentheses in units of the last digit.

[b] Number of lines in the fit.

[c] Standard deviation of the fit.

**Table S5.** Equilibrium coordinates (*r<sub>e</sub>*) calculated at the B3LYP-D4/def2-TZVP level of theory and substitution coordinates (*r<sub>s</sub>*) from Kraitchman's equations for single isotopic substitution of enol<sub>F</sub>-1W<sub>CH</sub>.

|    |    | a/Å                  |                      | b/Å                  |                      | c/Å                  |                      |
|----|----|----------------------|----------------------|----------------------|----------------------|----------------------|----------------------|
|    |    | <i>r<sub>e</sub></i> | <i>r<sub>s</sub></i> | <i>r<sub>e</sub></i> | <i>r<sub>s</sub></i> | <i>r<sub>e</sub></i> | <i>r<sub>s</sub></i> |
| 1  | C1 | 2.4953               |                      | 1.6712               |                      | 0.0165               |                      |
| 2  | H1 | 2.3225               |                      | 2.2808               |                      | 0.9076               |                      |
| 3  | H2 | 3.5245               |                      | 1.3222               |                      | 0.0031               |                      |
| 4  | H3 | 2.3063               |                      | 2.3126               |                      | -0.8480              |                      |
| 5  | C2 | 1.5341               |                      | 0.5198               |                      | 0.0090               |                      |
| 6  | C3 | 0.1144               |                      | 0.8060               |                      | -0.0088              |                      |
| 7  | H4 | -0.2334              |                      | 1.8258               |                      | -0.0269              |                      |
| 8  | C4 | -0.7772              |                      | -0.2139              |                      | -0.0001              |                      |
| 9  | C5 | -2.2808              |                      | 0.0104               |                      | -0.0071              |                      |
| 10 | F1 | -2.8511              |                      | -0.6259              |                      | -1.0397              |                      |
| 11 | F2 | -2.8342              |                      | -0.4580              |                      | 1.1225               |                      |
| 12 | F3 | -2.5847              |                      | 1.3140               |                      | -0.1047              |                      |
| 13 | O1 | 1.9387               |                      | -0.6575              |                      | 0.0214               |                      |
| 14 | O2 | -0.4607              |                      | -1.4905              |                      | 0.0227               |                      |
| 15 | H5 | 0.5428               | 1.195(1)             | -1.5158              | -1.504(1)            | 0.0279               | 0.16(1)              |
| 16 | O3 | 4.8082               | 5.0062(3)            | -0.6808              | -0.667(2)            | -0.0287              | -0.04 (4)            |
| 17 | H6 | 3.8668               | 3.9246(4)            | -0.9176              | -0.937(2)            | -0.0131              | 0 <sup>[a]</sup>     |
| 18 | H7 | 5.2958               | 5.4524(3)            | -1.5095              | -1.353(1)            | -0.0344              | -0.196(8)            |

[a] Set to zero by imaginary value.

**Table S6.** Equilibrium coordinates ( $r_e$ ) calculated at the B3LYP-D4/def2-TZVP level of theory and substitution coordinates ( $r_s$ ) from Kraitchman's equations for single isotopic substitution of enol<sub>H</sub>-1W<sub>CF</sub>.

|    |    | a/Å     |            | b/Å     |           | c/Å     |                  |
|----|----|---------|------------|---------|-----------|---------|------------------|
|    |    | $r_e$   | $r_s$      | $r_e$   | $r_s$     | $r_e$   | $r_s$            |
| 1  | C1 | 3.8793  |            | -0.3258 |           | 0.0197  |                  |
| 2  | H1 | 3.8947  |            | -1.4126 |           | 0.0463  |                  |
| 3  | H2 | 4.4153  |            | 0.0240  |           | -0.8658 |                  |
| 4  | H3 | 4.4058  |            | 0.0688  |           | 0.8914  |                  |
| 5  | C2 | 2.4885  |            | 0.2010  |           | -0.0017 |                  |
| 6  | C3 | 1.3693  |            | -0.5960 |           | -0.0189 |                  |
| 7  | H4 | 1.4747  |            | -1.6690 |           | -0.0180 |                  |
| 8  | C4 | 0.0790  |            | -0.0063 |           | -0.0309 |                  |
| 9  | C5 | -1.1320 |            | -0.9690 |           | -0.0023 |                  |
| 10 | F1 | 2.4124  |            | 1.5156  |           | -0.0028 |                  |
| 11 | F2 | -0.1445 |            | 1.2102  |           | -0.0405 |                  |
| 12 | F3 | 1.4484  |            | 1.7658  |           | -0.0199 |                  |
| 13 | O1 | -1.1892 |            | -1.5994 |           | 1.1864  |                  |
| 14 | O2 | -2.2818 |            | -0.3213 |           | -0.1875 |                  |
| 15 | H5 | -1.0234 |            | -1.9095 |           | -0.9586 |                  |
| 16 | O3 | -2.6039 | -2.5361(7) | 2.8833  | 2.7881(7) | 0.0243  | 0 <sup>[a]</sup> |
| 17 | H6 | -1.8204 |            | 2.3164  |           | -0.0030 |                  |
| 18 | H7 | -3.3475 |            | 2.2820  |           | -0.0803 |                  |

[a] Set to zero by imaginary value.



**Table S7.** Equilibrium coordinates ( $r_e$ ) calculated at the B3LYP-D4/def2-TZVP level of theory and substitution coordinates ( $r_s$ ) from Kraitchman's equations for single isotopic substitution of enol<sub>H</sub>-2W<sub>OH</sub>.

|    |    | a/Å     |           | b/Å     |           | c/Å     |                  |
|----|----|---------|-----------|---------|-----------|---------|------------------|
|    |    | $r_e$   | $r_s$     | $r_e$   | $r_s$     | $r_e$   | $r_s$            |
| 1  | C1 | -1.9514 |           | -3.1057 |           | -0.0039 |                  |
| 2  | H1 | -2.5397 |           | -3.2881 |           | -0.9059 |                  |
| 3  | H2 | -1.1507 |           | -3.8384 |           | 0.0585  |                  |
| 4  | H3 | -2.6229 |           | -3.2270 |           | 0.8489  |                  |
| 5  | C2 | -1.4241 |           | -1.7075 |           | -0.0294 |                  |
| 6  | C3 | -0.0771 |           | -1.4555 |           | 0.0415  |                  |
| 7  | H4 | 0.5848  |           | -2.3011 |           | 0.1468  |                  |
| 8  | C4 | 0.4970  |           | -0.1596 |           | -0.0506 |                  |
| 9  | C5 | 2.0474  |           | -0.1096 |           | 0.0273  |                  |
| 10 | F1 | 2.4989  |           | 1.1450  |           | 0.0703  |                  |
| 11 | F2 | 2.4987  |           | -0.7517 |           | 1.1238  |                  |
| 12 | F3 | 2.5936  |           | -0.7134 |           | -1.0474 |                  |
| 13 | O1 | -0.1061 |           | 0.8955  |           | -0.2062 |                  |
| 14 | O2 | -2.3848 |           | -0.8221 |           | -0.1272 |                  |
| 15 | H5 | -2.1496 | -2.199(8) | 0.1423  | 0.64 (3)  | -0.0553 | 0 <sup>[a]</sup> |
| 16 | O3 | -0.7527 | -0.80(5)  | 3.5586  | 3.58(1)   | -0.1674 | 0                |
| 17 | H6 | -0.1959 | -0.396(3) | 2.7625  | 2.669(4)  | -0.2361 | 0                |
| 18 | H7 | -0.3741 | 0         | 4.0926  | 4.17 (1)  | 0.5379  | 0.53(9)          |
| 19 | O4 | -2.8285 | -2.993(1) | 1.7717  | 1.852 (2) | 0.2951  | 0                |
| 20 | H8 | -3.6497 | -3.83 (4) | 2.0290  | 1.94 (9)  | -0.1344 | -0.3(5)          |
| 21 | H9 | -2.1966 | -2.48(2)  | 2.5074  | 2.46 (2)  | 0.1561  | 0.1 (4)          |

[a] Set to zero by imaginary value.

**Table S8.** Equilibrium coordinates ( $r_e$ ) calculated at the B3LYP-D4/def2-TZVP level of theory of enol<sub>F</sub>-2W<sub>CH</sub>.

|    |    | a/Å     | b/Å     | c/Å     |
|----|----|---------|---------|---------|
|    |    | $r_e$   | $r_e$   | $r_e$   |
| 1  | C1 | -2.0956 | 1.6089  | -1.0855 |
| 2  | H1 | -2.5325 | 1.8622  | -0.1137 |
| 3  | H2 | -1.5936 | 2.4912  | -1.4823 |
| 4  | H3 | -2.8950 | 1.2954  | -1.7546 |
| 5  | C2 | -1.1378 | 0.4841  | -0.8585 |
| 6  | C3 | 0.2200  | 0.7860  | -0.4692 |
| 7  | H4 | 0.5426  | 1.8091  | -0.3730 |
| 8  | C4 | 1.0844  | -0.2247 | -0.2095 |
| 9  | C5 | 2.5221  | 0.0158  | 0.2209  |
| 10 | O1 | -1.5111 | -0.7009 | -0.9760 |
| 11 | O2 | 0.7950  | -1.5043 | -0.2934 |
| 12 | H5 | -0.1677 | -1.5413 | -0.5769 |
| 13 | F1 | 3.3764  | -0.5540 | -0.6428 |
| 14 | F2 | 2.8068  | 1.3255  | 0.2807  |
| 15 | F3 | 2.7474  | -0.5123 | 1.4341  |
| 16 | O3 | -3.9732 | -1.3593 | 0.1783  |
| 17 | H6 | -4.7467 | -1.3104 | -0.3916 |
| 18 | H7 | -3.1948 | -1.2475 | -0.3984 |
| 19 | O4 | -3.1465 | 0.7787  | 1.8075  |
| 20 | H8 | -3.1016 | 0.5686  | 2.7446  |
| 21 | H9 | -3.5586 | 0.0057  | 1.3768  |

[a] Set to zero by imaginary value.

**Table S9.** Equilibrium coordinates ( $r_e$ ) calculated at the B3LYP-D4/def2-TZVP level of theory of enol<sub>F</sub>-3W<sub>CH</sub>.

|    |     | a/Å       | b/Å       | c/Å       |
|----|-----|-----------|-----------|-----------|
|    |     | $r_e$     | $r_e$     | $r_e$     |
| 1  | C1  | 1.666567  | -0.669030 | 1.998366  |
| 2  | H1  | 2.612645  | -1.175595 | 1.820535  |
| 3  | H2  | 1.177505  | -1.086777 | 2.880752  |
| 4  | H3  | 1.848534  | 0.392237  | 2.184066  |
| 5  | C2  | 0.772082  | -0.775524 | 0.804602  |
| 6  | C3  | -0.595545 | -0.320918 | 0.922562  |
| 7  | H4  | -0.954706 | 0.066789  | 1.861254  |
| 8  | C4  | -1.405639 | -0.332552 | -0.159807 |
| 9  | C5  | -2.836841 | 0.175137  | -0.122083 |
| 10 | O1  | 1.190933  | -1.244905 | -0.272770 |
| 11 | O2  | -1.060212 | -0.756161 | -1.359422 |
| 12 | H5  | -0.107944 | -1.051039 | -1.272980 |
| 13 | F1  | -3.693187 | -0.775827 | -0.526276 |
| 14 | F2  | -2.982987 | 1.231398  | -0.939574 |
| 15 | F3  | -3.197944 | 0.556358  | 1.112820  |
| 16 | O3  | 4.145608  | 1.452328  | -0.740066 |
| 17 | H6  | 4.891976  | 1.723981  | -0.197245 |
| 18 | H7  | 4.173021  | 0.471336  | -0.773494 |
| 19 | O4  | 3.917498  | -1.290515 | -0.694324 |
| 20 | H8  | 4.160879  | -1.830045 | -1.452953 |
| 21 | H9  | 2.947620  | -1.385377 | -0.583680 |
| 22 | O5  | 1.653917  | 2.048220  | 0.353300  |
| 23 | H10 | 1.219021  | 2.740401  | -0.152704 |
| 24 | H11 | 2.512812  | 1.892314  | -0.091850 |

**Table S10.** The optimized hydrogen bonding parameters  $r_e$  at the B3LYP-D4/def2-TZVP level of theory of the TFAA-(H<sub>2</sub>O)<sub>1-3</sub> clusters.

|       | enol <sub>H</sub> | enol <sub>F</sub> -1W <sub>CH</sub> | enol <sub>H</sub> -1W <sub>CF</sub> | enol <sub>H</sub> -2W <sub>OH</sub> | enol <sub>F</sub> -2W <sub>CH</sub> | enol <sub>F</sub> -3W <sub>CH</sub> |
|-------|-------------------|-------------------------------------|-------------------------------------|-------------------------------------|-------------------------------------|-------------------------------------|
| O1-O2 | 2.57              | 2.54                                | 2.58                                | 2.85                                | 2.54                                | 2.55                                |
| O1-O3 | -                 | 2.87                                | -                                   | 2.67                                | 2.80                                | 2.76                                |
| O2-O3 | -                 | -                                   | 2.98                                | -                                   | -                                   | -                                   |
| O2-O4 | -                 | -                                   | -                                   | 2.75                                | -                                   | -                                   |
| O3-O4 | -                 | -                                   | -                                   | 2.78/ 2.79(4) <sup>[a]</sup>        | 2.81                                | 2.75                                |
| O4-O5 | -                 | -                                   | -                                   | -                                   | -                                   | 2.79                                |

[a] Compared with the experimental values  $r_s$ .

**Table S11.** NBO stabilization energy contributions (calculated at the B3LYP-D4/def2-TZVP level of theory) of intramolecular hydrogen bond in observed conformers.

|                                     | Donor NBO | Acceptor NBO | E(2) (kJ mol <sup>-1</sup> ) |
|-------------------------------------|-----------|--------------|------------------------------|
| enol <sub>H</sub>                   | LP(1)O2   | BD*(1)O1-H5  | 3.93                         |
|                                     | LP(2)O2   | BD*(1)O1-H5  | 22.17                        |
| enol <sub>F</sub> -1W <sub>CH</sub> | LP(1)O1   | BD*(1)O2-H5  | 4.42                         |
|                                     | LP(2)O1   | BD*(1)O2-H5  | 25.12                        |
| enol <sub>H</sub> -1W <sub>CF</sub> | LP(1)O2   | BD*(1)O1-H5  | 3.94                         |
|                                     | LP(2)O2   | BD*(1)O1-H5  | 19.39                        |
| enol <sub>H</sub> -2W <sub>OH</sub> | LP(1)O2   | BD*(1)O1-H5  | <b>0.79</b>                  |
|                                     | LP(2)O2   | BD*(1)O1-H5  | <b>2.18</b>                  |
| enol <sub>F</sub> -2W <sub>CH</sub> | LP(1)O1   | BD*(1)O2-H5  | 5.09                         |
|                                     | LP(2)O1   | BD*(1)O2-H5  | 26.33                        |
| enol <sub>F</sub> -3W <sub>CH</sub> | LP(1)O1   | BD*(1)O2-H5  | 5.34                         |
|                                     | LP(2)O1   | BD*(1)O2-H5  | 21.94                        |

**Table S12.** NBO stabilization energy contributions in chelated ring and that between TFAA and water at the B3LYP-D4/def2-TZVP level of theory.

|                     |              | enol <sub>H</sub>           | enol <sub>F</sub> | enol <sub>H</sub> <sup>-</sup><br>1W <sub>CF</sub> | enol <sub>F</sub> <sup>-</sup><br>1W <sub>CH</sub> | enol <sub>H</sub> <sup>-</sup><br>2W <sub>CF</sub> | enol <sub>F</sub> <sup>-</sup><br>2W <sub>CH</sub> | enol <sub>H</sub> <sup>-</sup><br>3W <sub>CF</sub> | enol <sub>F</sub> <sup>-</sup><br>3W <sub>CH</sub> |
|---------------------|--------------|-----------------------------|-------------------|----------------------------------------------------|----------------------------------------------------|----------------------------------------------------|----------------------------------------------------|----------------------------------------------------|----------------------------------------------------|
| Donor NBO           | Acceptor NBO | E(2)(kJ mol <sup>-1</sup> ) |                   |                                                    |                                                    |                                                    |                                                    |                                                    |                                                    |
| In TFAA             |              |                             |                   |                                                    |                                                    |                                                    |                                                    |                                                    |                                                    |
| LP O2               | BD* C3-C4    | 60.06                       | 58.87             | 56.783                                             | 58.62                                              | 54.74                                              | 59.05                                              | 55.25                                              | 56.35                                              |
| BD C3-C4            | BD* C2-O1    | 37.73                       | 26.88             | 39.19                                              | 28.15                                              | 39.9                                               | 28.88                                              | 42.19                                              | 28.11                                              |
| LP O1               | BD* O2-H5    | 27.03                       | 33.71             | 33.77                                              | 29.99                                              | 37.35                                              | 31.24                                              | 40                                                 | 27.28                                              |
| BD C2-O1            | BD* C3-C4    | 3.45                        | 3.68              | 3.44                                               | 3.49                                               | 3.42                                               | 3.31                                               | 3.31                                               | 3.31                                               |
| From TFAA to water  |              |                             |                   |                                                    |                                                    |                                                    |                                                    |                                                    |                                                    |
| LP O1               | BD*(1)O3-H6  |                             |                   | 2.57                                               | 5.91                                               | 5.63                                               | 8.02                                               | 7.27                                               | 12.31                                              |
| From water to water |              |                             |                   |                                                    |                                                    |                                                    |                                                    |                                                    |                                                    |
| LP(2)O3             | BD*(1)O4-H8  |                             |                   |                                                    |                                                    | 10.92                                              | 11.55                                              | 14.07                                              | 15.78                                              |
| LP(2)O4             | BD*(1)O5-H10 |                             |                   |                                                    |                                                    |                                                    |                                                    | 13.6                                               | 14.39                                              |
| From water to TFAA  |              |                             |                   |                                                    |                                                    |                                                    |                                                    |                                                    |                                                    |
| LP(2)O3             | BD*(1)C1-H2  |                             |                   | 0.84                                               | 1.02                                               |                                                    |                                                    |                                                    |                                                    |
| LP(2)O4             | BD*(1)C1-H1  |                             |                   |                                                    |                                                    | 3.94                                               | 3.13                                               |                                                    |                                                    |
| LP(2)O5             | BD*(1)C1-H3  |                             |                   |                                                    |                                                    |                                                    |                                                    | 0.83                                               | 0.78                                               |
| LP(2)O5             | BD*(1)C2-O1  |                             |                   |                                                    |                                                    |                                                    |                                                    |                                                    | 1.38                                               |

**Table S13.** Experimental transition frequencies ( $\nu$ /MHz) and obs-calc. values ( $\Delta\nu$ /MHz) of enol<sub>F</sub>-1W<sub>CH</sub>.

| $J'$ | $K_a'$ | $K_c'$ | $J''$ | $K_a''$ | $K_c''$ | $\nu$     | $\Delta\nu$ |
|------|--------|--------|-------|---------|---------|-----------|-------------|
| 3    | 0      | 3      | 2     | 0       | 2       | 2496.4017 | -0.0003     |
| 4    | 0      | 4      | 3     | 0       | 3       | 3325.8364 | 0.0045      |
| 5    | 0      | 5      | 4     | 0       | 4       | 4152.9633 | 0.0011      |
| 6    | 0      | 6      | 5     | 0       | 5       | 4977.2609 | 0.0030      |
| 7    | 0      | 7      | 6     | 0       | 6       | 5798.2370 | 0.0008      |
| 8    | 0      | 8      | 7     | 0       | 7       | 6615.4999 | 0.0016      |
| 3    | 1      | 3      | 2     | 1       | 2       | 2439.1527 | 0.0002      |
| 3    | 1      | 2      | 2     | 1       | 1       | 2557.5710 | 0.0027      |
| 3    | 1      | 2      | 2     | 1       | 1       | 2557.5710 | 0.0027      |
| 4    | 1      | 4      | 3     | 1       | 3       | 3251.5379 | 0.0007      |
| 4    | 1      | 3      | 3     | 1       | 2       | 3409.4050 | 0.0050      |
| 5    | 1      | 5      | 4     | 1       | 4       | 4063.3660 | -0.0006     |
| 5    | 1      | 4      | 4     | 1       | 3       | 4260.6264 | 0.0033      |
| 6    | 1      | 6      | 5     | 1       | 5       | 4874.5233 | 0.0017      |
| 6    | 1      | 5      | 5     | 1       | 4       | 5111.0696 | 0.0043      |
| 7    | 1      | 7      | 6     | 1       | 6       | 5684.8960 | 0.0006      |
| 7    | 1      | 6      | 6     | 1       | 5       | 5960.5357 | -0.0045     |
| 8    | 1      | 8      | 7     | 1       | 7       | 6494.3959 | 0.0001      |
| 8    | 1      | 7      | 7     | 1       | 6       | 6808.8412 | -0.0036     |
| 9    | 1      | 9      | 8     | 1       | 8       | 7302.9437 | -0.0034     |
| 4    | 2      | 3      | 3     | 2       | 2       | 3331.1799 | 0.0016      |
| 5    | 2      | 4      | 4     | 2       | 3       | 4163.2455 | 0.0002      |
| 5    | 2      | 3      | 4     | 2       | 2       | 4174.8160 | -0.0020     |
| 6    | 2      | 5      | 5     | 2       | 4       | 4994.8267 | -0.0008     |
| 6    | 2      | 4      | 5     | 2       | 3       | 5015.0050 | -0.0026     |
| 7    | 2      | 6      | 6     | 2       | 5       | 5825.8291 | 0.0007      |
| 7    | 2      | 5      | 6     | 2       | 4       | 5857.9223 | -0.0072     |
| 8    | 2      | 7      | 7     | 2       | 6       | 6656.1442 | -0.0082     |
| 8    | 2      | 6      | 7     | 2       | 5       | 6703.8815 | -0.0020     |
| 9    | 2      | 8      | 8     | 2       | 7       | 7485.6991 | -0.0053     |
| 9    | 2      | 7      | 8     | 2       | 6       | 7553.0447 | -0.0024     |
| 8    | 3      | 6      | 7     | 3       | 5       | 6669.5394 | -0.0107     |
| 1    | 1      | 1      | 0     | 0       | 0       | 2826.0024 | 0.0078      |
| 2    | 1      | 2      | 1     | 0       | 1       | 3619.4369 | 0.0082      |
| 3    | 1      | 3      | 2     | 0       | 2       | 4393.3517 | 0.0060      |
| 4    | 1      | 4      | 3     | 0       | 3       | 5148.4884 | 0.0074      |
| 5    | 1      | 5      | 4     | 0       | 4       | 5886.0155 | -0.0002     |
| 6    | 1      | 6      | 5     | 0       | 5       | 6607.5803 | 0.0052      |
| 7    | 1      | 7      | 6     | 0       | 6       | 7315.2114 | -0.0012     |
| 8    | 1      | 8      | 7     | 0       | 7       | 8011.3670 | -0.0053     |
| 9    | 1      | 9      | 8     | 0       | 8       | 8698.8071 | -0.0139     |
| 5    | 0      | 5      | 4     | 1       | 4       | 2330.3082 | -0.0049     |
| 6    | 0      | 6      | 5     | 1       | 5       | 3244.2040 | -0.0004     |
| 7    | 0      | 7      | 6     | 1       | 6       | 4167.9231 | 0.0042      |
| 8    | 0      | 8      | 7     | 1       | 7       | 5098.5242 | 0.0022      |
| 2    | 1      | 1      | 2     | 0       | 2       | 2072.6238 | 0.0094      |
| 3    | 1      | 2      | 3     | 0       | 3       | 2133.7901 | 0.0093      |
| 4    | 1      | 3      | 4     | 0       | 4       | 2217.3605 | 0.0116      |
| 5    | 1      | 4      | 5     | 0       | 5       | 2325.0195 | 0.0096      |
| 6    | 1      | 5      | 6     | 0       | 6       | 2458.8165 | -0.0008     |

|    |   |    |    |   |    |           |         |
|----|---|----|----|---|----|-----------|---------|
| 7  | 1 | 6  | 7  | 0 | 7  | 2621.1291 | 0.0079  |
| 8  | 1 | 7  | 8  | 0 | 8  | 2814.4783 | 0.0105  |
| 9  | 1 | 8  | 9  | 0 | 9  | 3041.4537 | -0.0046 |
| 10 | 1 | 9  | 10 | 0 | 10 | 3304.5574 | -0.0141 |
| 11 | 1 | 10 | 11 | 0 | 11 | 3605.9444 | -0.0142 |
| 11 | 2 | 9  | 11 | 1 | 10 | 5179.6433 | 0.0020  |
| 10 | 2 | 8  | 10 | 1 | 9  | 5263.1496 | -0.0037 |
| 9  | 2 | 7  | 9  | 1 | 8  | 5358.7396 | -0.0079 |
| 8  | 2 | 6  | 8  | 1 | 7  | 5461.4485 | -0.0091 |
| 7  | 2 | 5  | 7  | 1 | 6  | 5566.4142 | -0.0047 |
| 6  | 2 | 4  | 6  | 1 | 5  | 5669.0230 | -0.0066 |
| 5  | 2 | 3  | 5  | 1 | 4  | 5765.0879 | 0.0006  |
| 4  | 2 | 2  | 4  | 1 | 3  | 5850.8962 | 0.0039  |
| 3  | 2 | 2  | 3  | 1 | 3  | 6157.2565 | 0.0052  |
| 4  | 2 | 3  | 4  | 1 | 4  | 6236.9005 | 0.0081  |
| 5  | 2 | 4  | 5  | 1 | 5  | 6336.7784 | 0.0074  |
| 6  | 2 | 5  | 6  | 1 | 6  | 6457.0858 | 0.0090  |
| 7  | 2 | 6  | 7  | 1 | 7  | 6598.0178 | 0.0079  |
| 8  | 2 | 7  | 8  | 1 | 8  | 6759.7623 | -0.0042 |
| 10 | 2 | 9  | 10 | 1 | 10 | 7146.4117 | -0.0127 |
| 9  | 0 | 9  | 8  | 1 | 8  | 6032.9093 | 0.0165  |
| 10 | 0 | 10 | 9  | 1 | 9  | 6967.8818 | 0.0159  |
| 9  | 1 | 8  | 8  | 1 | 7  | 7655.7614 | 0.0042  |
| 4  | 2 | 2  | 3  | 2 | 1  | 3336.9659 | -0.0103 |

**Table S14.** Experimental transition frequencies ( $\nu$ /MHz) and obs-calc. values ( $\Delta\nu$ /MHz) of  $^{18}\text{O}$ -3 isotopologues of enolF-1W<sub>CH</sub>.

| $J'$ | $K_a'$ | $K_c'$ | $J''$ | $K_a''$ | $K_c''$ | $\nu$     | $\Delta\nu$ |
|------|--------|--------|-------|---------|---------|-----------|-------------|
| 3    | 0      | 3      | 2     | 0       | 2       | 2397.4916 | -0.0010     |
| 4    | 0      | 4      | 3     | 0       | 3       | 3194.3303 | 0.0001      |
| 5    | 0      | 5      | 4     | 0       | 4       | 3989.1902 | 0.0033      |
| 6    | 0      | 6      | 5     | 0       | 5       | 4781.5945 | -0.0025     |
| 7    | 0      | 7      | 6     | 0       | 6       | 5571.1354 | 0.0017      |
| 8    | 0      | 8      | 7     | 0       | 7       | 6357.4341 | 0.0011      |
| 3    | 1      | 3      | 2     | 1       | 2       | 2344.1782 | 0.0026      |
| 3    | 1      | 2      | 2     | 1       | 1       | 2454.1773 | -0.0013     |
| 4    | 1      | 4      | 3     | 1       | 3       | 3124.9961 | 0.0025      |
| 4    | 1      | 3      | 3     | 1       | 2       | 3271.6424 | -0.0020     |
| 5    | 1      | 5      | 4     | 1       | 4       | 3905.3293 | -0.0029     |
| 5    | 1      | 4      | 4     | 1       | 3       | 4088.5895 | 0.0011      |
| 6    | 1      | 6      | 5     | 1       | 5       | 4685.0817 | -0.0055     |
| 6    | 1      | 5      | 5     | 1       | 4       | 4904.8644 | 0.0005      |
| 7    | 1      | 7      | 6     | 1       | 6       | 5464.1637 | -0.0007     |
| 7    | 1      | 6      | 6     | 1       | 5       | 5720.3117 | -0.0017     |
| 8    | 1      | 8      | 7     | 1       | 7       | 6242.4869 | 0.0056      |
| 8    | 1      | 7      | 7     | 1       | 6       | 6534.7650 | -0.0009     |
| 1    | 1      | 1      | 0     | 0       | 0       | 2801.0844 | 0.0002      |
| 2    | 1      | 2      | 1     | 0       | 1       | 3564.2441 | -0.0008     |
| 3    | 1      | 3      | 2     | 0       | 2       | 4309.2583 | -0.0016     |
| 4    | 1      | 4      | 3     | 0       | 3       | 5036.7623 | 0.0014      |
| 5    | 1      | 5      | 4     | 0       | 4       | 5747.7638 | 0.0009      |
| 6    | 1      | 6      | 5     | 0       | 5       | 6443.6655 | 0.0023      |
| 7    | 1      | 7      | 6     | 0       | 6       | 7126.2345 | 0.0040      |
| 8    | 1      | 8      | 7     | 0       | 7       | 7797.5717 | -0.0065     |



**Table S15.** Experimental transition frequencies ( $\nu$ /MHz) and obs-calc. values ( $\Delta\nu$ /MHz) of D-5 isotopologues of enol<sub>F</sub>-1W<sub>CH</sub>.

| $J'$ | $K_a'$ | $K_c'$ | $J''$ | $K_a''$ | $K_c''$ | $\nu$     | $\Delta\nu$ |
|------|--------|--------|-------|---------|---------|-----------|-------------|
| 3    | 0      | 3      | 2     | 0       | 2       | 2491.2157 | -0.0018     |
| 4    | 0      | 4      | 3     | 0       | 3       | 3318.8058 | 0.0044      |
| 5    | 0      | 5      | 4     | 0       | 4       | 4143.9868 | 0.0006      |
| 6    | 0      | 6      | 5     | 0       | 5       | 4966.2154 | -0.0011     |
| 7    | 0      | 7      | 6     | 0       | 6       | 5785.0064 | 0.0126      |
| 8    | 0      | 8      | 7     | 0       | 7       | 6599.9141 | 0.0021      |
| 9    | 0      | 9      | 8     | 0       | 8       | 7410.6880 | -0.0089     |
| 5    | 1      | 4      | 4     | 1       | 3       | 4253.5299 | -0.0029     |
| 3    | 1      | 2      | 2     | 1       | 1       | 2553.3606 | -0.0067     |
| 4    | 1      | 4      | 3     | 1       | 3       | 3243.5112 | -0.0021     |
| 4    | 1      | 3      | 3     | 1       | 2       | 3403.7684 | 0.0004      |
| 5    | 1      | 5      | 4     | 1       | 4       | 4053.2884 | -0.0033     |
| 5    | 1      | 4      | 4     | 1       | 3       | 4253.5299 | -0.0029     |
| 6    | 1      | 6      | 5     | 1       | 5       | 4862.3585 | -0.0092     |
| 6    | 1      | 5      | 5     | 1       | 4       | 5102.4849 | 0.0041      |
| 7    | 1      | 7      | 6     | 1       | 6       | 5670.6379 | 0.0070      |
| 7    | 1      | 6      | 6     | 1       | 5       | 5950.4132 | -0.0034     |
| 8    | 1      | 7      | 7     | 1       | 6       | 6797.1200 | -0.0063     |
| 9    | 1      | 9      | 8     | 1       | 8       | 7284.3612 | 0.0033      |
| 9    | 1      | 8      | 8     | 1       | 7       | 7642.3728 | -0.0034     |
| 5    | 2      | 3      | 4     | 2       | 2       | 4166.7915 | -0.0034     |
| 6    | 2      | 5      | 5     | 2       | 4       | 4984.5457 | -0.0018     |
| 6    | 2      | 4      | 5     | 2       | 3       | 5005.6104 | 0.0070      |
| 7    | 2      | 6      | 6     | 2       | 5       | 5813.7800 | 0.0090      |
| 7    | 2      | 5      | 6     | 2       | 4       | 5847.2463 | -0.0079     |
| 8    | 2      | 7      | 7     | 2       | 6       | 6642.2857 | -0.0024     |
| 8    | 2      | 6      | 7     | 2       | 5       | 6692.0502 | 0.0000      |
| 2    | 1      | 2      | 1     | 0       | 1       | 3589.6024 | 0.0063      |
| 3    | 1      | 3      | 2     | 0       | 2       | 4360.9276 | -0.0032     |
| 4    | 1      | 4      | 3     | 0       | 3       | 5113.2256 | -0.0009     |
| 5    | 1      | 5      | 4     | 0       | 4       | 5847.7167 | -0.0002     |
| 6    | 1      | 6      | 5     | 0       | 5       | 6566.1057 | 0.0074      |
| 7    | 1      | 7      | 6     | 0       | 6       | 7270.5111 | -0.0017     |
| 8    | 1      | 8      | 7     | 0       | 7       | 7963.5046 | -0.0013     |
| 5    | 0      | 5      | 4     | 1       | 4       | 2349.5573 | -0.0037     |
| 6    | 0      | 6      | 5     | 1       | 5       | 3262.4950 | 0.0091      |
| 7    | 0      | 7      | 6     | 1       | 6       | 4185.1178 | 0.0058      |
| 8    | 0      | 8      | 7     | 1       | 7       | 5114.3841 | -0.0089     |
| 10   | 0      | 10     | 9     | 1       | 9       | 6979.9953 | 0.0067      |
| 2    | 2      | 0      | 1     | 1       | 1       | 7644.9147 | 0.0140      |
| 2    | 2      | 1      | 1     | 1       | 0       | 7604.2092 | -0.0133     |

**Table S16.** Experimental transition frequencies ( $\nu$ /MHz) and obs-calc. values ( $\Delta\nu$ /MHz) of D-6 isotopologues of enol<sub>F</sub>-1W<sub>CH</sub>.

| $J'$ | $K_a'$ | $K_c'$ | $J''$ | $K_a''$ | $K_c''$ | $\nu$     | $\Delta\nu$ |
|------|--------|--------|-------|---------|---------|-----------|-------------|
| 4    | 0      | 4      | 3     | 0       | 3       | 3283.0875 | -0.0010     |
| 5    | 0      | 5      | 4     | 0       | 4       | 4099.6862 | 0.0058      |
| 6    | 0      | 6      | 5     | 0       | 5       | 4913.5478 | 0.0148      |
| 7    | 0      | 7      | 6     | 0       | 6       | 5724.1728 | -0.0041     |
| 8    | 0      | 8      | 7     | 0       | 7       | 6531.2114 | -0.0108     |
| 1    | 1      | 1      | 0     | 0       | 0       | 2811.0868 | 0.0020      |
| 2    | 1      | 2      | 1     | 0       | 1       | 3594.5082 | 0.0068      |
| 3    | 1      | 3      | 2     | 0       | 2       | 4358.7449 | -0.0078     |
| 4    | 1      | 4      | 3     | 0       | 3       | 5104.5433 | -0.0060     |
| 5    | 1      | 5      | 4     | 0       | 4       | 5833.0305 | -0.0018     |
| 6    | 1      | 6      | 5     | 0       | 5       | 6545.7794 | 0.0069      |

**Table S17.** Experimental transition frequencies ( $\nu$ /MHz) and obs-calc. values ( $\Delta\nu$ /MHz) of D-7 isotopologues of enol<sub>F</sub>-1W<sub>CH</sub>.

| $J'$ | $K_a'$ | $K_c'$ | $J''$ | $K_a''$ | $K_c''$ | $\nu$     | $\Delta\nu$ |
|------|--------|--------|-------|---------|---------|-----------|-------------|
| 4    | 0      | 4      | 3     | 0       | 3       | 3244.0118 | 0.0033      |
| 5    | 0      | 5      | 4     | 0       | 4       | 4050.9568 | 0.0032      |
| 6    | 0      | 6      | 5     | 0       | 5       | 4855.2373 | -0.0016     |
| 7    | 0      | 7      | 6     | 0       | 6       | 5656.4089 | 0.0021      |
| 8    | 0      | 8      | 7     | 0       | 7       | 6454.0847 | 0.0099      |
| 3    | 1      | 2      | 2     | 1       | 1       | 2493.9205 | 0.0021      |
| 4    | 1      | 4      | 3     | 1       | 3       | 3172.1397 | 0.0063      |
| 4    | 1      | 3      | 3     | 1       | 2       | 3324.5835 | 0.0053      |
| 5    | 1      | 5      | 4     | 1       | 4       | 3964.1864 | 0.0077      |
| 5    | 1      | 4      | 4     | 1       | 3       | 4154.6691 | -0.0001     |
| 6    | 1      | 6      | 5     | 1       | 5       | 4755.5930 | 0.0015      |
| 6    | 1      | 5      | 5     | 1       | 4       | 4984.0328 | 0.0022      |
| 7    | 1      | 7      | 6     | 1       | 6       | 5546.2788 | 0.0079      |
| 7    | 1      | 6      | 6     | 1       | 5       | 5812.4902 | 0.0009      |
| 8    | 1      | 8      | 7     | 1       | 7       | 6336.1254 | -0.0042     |
| 4    | 2      | 3      | 3     | 2       | 2       | 3249.0250 | 0.0039      |
| 4    | 2      | 2      | 3     | 2       | 1       | 3254.4524 | -0.0047     |
| 5    | 2      | 4      | 4     | 2       | 3       | 4060.5943 | -0.0018     |
| 5    | 2      | 3      | 4     | 2       | 2       | 4071.4380 | -0.0098     |
| 6    | 2      | 5      | 5     | 2       | 4       | 4871.7134 | -0.0044     |
| 6    | 2      | 4      | 5     | 2       | 3       | 4890.6453 | 0.0011      |
| 7    | 2      | 6      | 6     | 2       | 5       | 5682.2890 | -0.0071     |
| 7    | 2      | 5      | 6     | 2       | 4       | 5712.4060 | -0.0066     |
| 8    | 2      | 7      | 7     | 2       | 6       | 6492.2247 | -0.0166     |
| 8    | 2      | 6      | 7     | 2       | 5       | 6537.0482 | 0.0047      |
| 9    | 2      | 8      | 8     | 2       | 7       | 7301.4483 | -0.0162     |
| 1    | 1      | 1      | 0     | 0       | 0       | 2795.4215 | 0.0065      |
| 2    | 1      | 2      | 1     | 0       | 1       | 3569.6714 | 0.0137      |
| 3    | 1      | 3      | 2     | 0       | 2       | 4325.0510 | 0.0035      |
| 4    | 1      | 4      | 3     | 0       | 3       | 5062.2732 | -0.0007     |
| 5    | 1      | 5      | 4     | 0       | 4       | 5782.4401 | -0.0041     |
| 6    | 1      | 6      | 5     | 0       | 5       | 6487.0775 | -0.0045     |
| 7    | 1      | 7      | 6     | 0       | 6       | 7178.1049 | -0.0091     |
| 8    | 1      | 8      | 7     | 0       | 7       | 7857.8425 | 0.0057      |
| 5    | 0      | 5      | 4     | 1       | 4       | 2232.6957 | 0.0075      |
| 7    | 0      | 7      | 6     | 1       | 6       | 4024.5669 | 0.0031      |
| 8    | 0      | 8      | 7     | 1       | 7       | 4932.3834 | 0.0158      |
| 1    | 1      | 0      | 1     | 0       | 1       | 2021.1790 | 0.0066      |
| 2    | 1      | 1      | 2     | 0       | 2       | 2059.8188 | -0.0163     |
| 3    | 1      | 2      | 3     | 0       | 3       | 2118.8371 | -0.0095     |
| 4    | 1      | 3      | 4     | 0       | 4       | 2199.4142 | -0.0021     |
| 6    | 1      | 5      | 6     | 0       | 6       | 2431.9257 | 0.0023      |
| 7    | 1      | 6      | 7     | 0       | 7       | 2588.0013 | -0.0046     |
| 8    | 1      | 7      | 8     | 0       | 8       | 2773.7841 | -0.0040     |
| 9    | 1      | 8      | 9     | 0       | 9       | 2991.7266 | -0.0208     |
| 2    | 2      | 1      | 2     | 1       | 2       | 6063.5309 | 0.0138      |
| 4    | 2      | 2      | 4     | 1       | 3       | 5824.9127 | -0.0134     |
| 6    | 2      | 4      | 6     | 1       | 5       | 5648.3056 | -0.0128     |
| 7    | 2      | 5      | 7     | 1       | 6       | 5548.2355 | -0.0062     |
| 8    | 2      | 6      | 8     | 1       | 7       | 5445.4208 | -0.0075     |

|   |   |   |    |   |   |           |        |
|---|---|---|----|---|---|-----------|--------|
| 0 | 2 | 8 | 10 | 1 | 9 | 5249.2210 | 0.0044 |
| 4 | 2 | 3 | 4  | 1 | 4 | 6197.9405 | 0.0201 |
| 5 | 2 | 4 | 5  | 1 | 5 | 6294.3469 | 0.0091 |
| 6 | 2 | 5 | 6  | 1 | 6 | 6410.4770 | 0.0128 |

**Table S18.** Experimental transition frequencies ( $\nu$ /MHz) and obs-calc. values ( $\Delta\nu$ /MHz) of enol<sub>H</sub>-1W<sub>CF</sub>.

| $J$ | $K_a'$ | $K_c'$ | $J''$ | $K_a''$ | $K_c''$ | $\nu$     | $\Delta\nu$ |
|-----|--------|--------|-------|---------|---------|-----------|-------------|
| 2   | 0      | 2      | 1     | 0       | 1       | 2249.6334 | 0.0079      |
| 3   | 0      | 3      | 2     | 0       | 2       | 3285.5315 | -0.0061     |
| 4   | 0      | 4      | 3     | 0       | 3       | 4254.8129 | -0.0007     |
| 5   | 0      | 5      | 4     | 0       | 4       | 5191.6363 | 0.0052      |
| 6   | 0      | 6      | 5     | 0       | 5       | 6125.5681 | -0.0127     |
| 7   | 0      | 7      | 6     | 0       | 6       | 7065.8758 | -0.0053     |
| 3   | 1      | 3      | 2     | 1       | 2       | 3122.1578 | 0.0134      |
| 4   | 1      | 4      | 3     | 1       | 3       | 4127.1505 | 0.0029      |
| 5   | 1      | 5      | 4     | 1       | 4       | 5113.0618 | -0.0044     |
| 6   | 1      | 6      | 5     | 1       | 5       | 6084.4308 | -0.0063     |
| 7   | 1      | 7      | 6     | 1       | 6       | 7046.3962 | 0.0041      |
| 8   | 1      | 8      | 7     | 1       | 7       | 8003.0349 | 0.0092      |
| 3   | 1      | 2      | 2     | 1       | 1       | 3694.8515 | 0.0000      |
| 4   | 1      | 3      | 3     | 1       | 2       | 4867.4357 | 0.0090      |
| 5   | 1      | 4      | 4     | 1       | 3       | 5976.9769 | -0.0125     |
| 6   | 1      | 5      | 5     | 1       | 4       | 7006.1689 | 0.0041      |
| 5   | 1      | 5      | 4     | 0       | 4       | 5267.1600 | 0.0043      |
| 6   | 1      | 6      | 5     | 0       | 5       | 6159.9484 | -0.0132     |
| 7   | 1      | 7      | 6     | 0       | 6       | 7080.7721 | -0.0008     |
| 2   | 2      | 1      | 1     | 1       | 0       | 4276.5866 | -0.0081     |
| 3   | 2      | 2      | 2     | 1       | 1       | 5228.5208 | -0.0036     |
| 4   | 2      | 3      | 3     | 1       | 2       | 6080.8804 | 0.0001      |
| 5   | 2      | 4      | 4     | 1       | 3       | 6848.8103 | 0.0146      |
| 4   | 0      | 4      | 3     | 1       | 3       | 3973.0581 | 0.0000      |
| 5   | 0      | 5      | 4     | 1       | 4       | 5037.5458 | 0.0041      |
| 6   | 0      | 6      | 5     | 1       | 5       | 6050.0565 | 0.0001      |
| 7   | 0      | 7      | 6     | 1       | 6       | 7031.4996 | -0.0007     |

**Table S19.** Experimental transition frequencies ( $\nu$ /MHz) and obs-calc. values ( $\Delta\nu$ /MHz) of <sup>18</sup>O-3 isotopologues of enol<sub>H</sub>-1W<sub>CF</sub>.

| $J$ | $K_a'$ | $K_c'$ | $J''$ | $K_a''$ | $K_c''$ | $\nu$     | $\Delta\nu$ |
|-----|--------|--------|-------|---------|---------|-----------|-------------|
| 7   | 0      | 7      | 6     | 0       | 6       | 6884.5071 | -0.0024     |
| 8   | 0      | 8      | 7     | 0       | 7       | 7806.5414 | -0.0039     |
| 9   | 0      | 9      | 8     | 0       | 8       | 8731.4012 | 0.0008      |
| 7   | 1      | 7      | 6     | 1       | 6       | 6868.1358 | 0.0004      |
| 8   | 1      | 8      | 7     | 1       | 7       | 7799.5074 | 0.0020      |
| 9   | 1      | 9      | 8     | 1       | 8       | 8728.5039 | 0.0059      |
| 6   | 1      | 5      | 5     | 1       | 4       | 6837.3686 | -0.0015     |
| 7   | 1      | 6      | 6     | 1       | 5       | 7760.1752 | -0.0062     |
| 8   | 1      | 7      | 7     | 1       | 6       | 8652.0903 | 0.0082      |
| 7   | 0      | 7      | 6     | 1       | 6       | 6856.3057 | 0.0062      |
| 8   | 0      | 8      | 7     | 1       | 7       | 7794.7105 | 0.0009      |
| 7   | 1      | 7      | 6     | 0       | 6       | 6896.3501 | 0.0046      |
| 8   | 1      | 8      | 7     | 0       | 7       | 7811.3324 | -0.0088     |

|   |   |   |   |   |   |           |         |
|---|---|---|---|---|---|-----------|---------|
| 9 | 1 | 9 | 8 | 0 | 8 | 8733.2874 | -0.0064 |
|---|---|---|---|---|---|-----------|---------|

**Table S20.** Experimental transition frequencies ( $\nu$ /MHz) and obs-calc. values ( $\Delta\nu$ /MHz) of enol<sub>H</sub>-2W<sub>OH</sub>.

| $J'$ | $K_a'$ | $K_c'$ | $J''$ | $K_a''$ | $K_c''$ | $\nu$     | $\Delta\nu$ |
|------|--------|--------|-------|---------|---------|-----------|-------------|
| 3    | 0      | 3      | 2     | 0       | 2       | 2613.4853 | 0.0042      |
| 4    | 0      | 4      | 3     | 0       | 3       | 3354.6862 | 0.0073      |
| 5    | 0      | 5      | 4     | 0       | 4       | 4106.6296 | 0.0092      |
| 8    | 0      | 8      | 7     | 0       | 7       | 6372.4148 | -0.0017     |
| 9    | 0      | 9      | 8     | 0       | 8       | 7127.9730 | 0.0025      |
| 3    | 1      | 3      | 2     | 1       | 2       | 2577.0043 | 0.0084      |
| 3    | 1      | 2      | 2     | 1       | 1       | 3286.1817 | -0.0144     |
| 4    | 1      | 4      | 3     | 1       | 3       | 3346.6815 | 0.0076      |
| 5    | 1      | 4      | 4     | 1       | 3       | 4791.3303 | -0.0034     |
| 6    | 1      | 5      | 5     | 1       | 4       | 5525.5099 | -0.0178     |
| 7    | 1      | 7      | 6     | 1       | 6       | 5616.8415 | -0.0138     |
| 8    | 1      | 8      | 7     | 1       | 7       | 6372.4147 | 0.0027      |
| 9    | 1      | 9      | 8     | 1       | 8       | 7127.9730 | 0.0032      |
| 4    | 2      | 3      | 3     | 2       | 2       | 3933.5501 | 0.0078      |
| 6    | 2      | 5      | 5     | 2       | 4       | 5513.9026 | -0.0068     |
| 5    | 2      | 3      | 4     | 2       | 2       | 5538.1303 | -0.0134     |
| 6    | 2      | 4      | 5     | 2       | 3       | 6267.7445 | 0.0002      |
| 4    | 3      | 2      | 3     | 3       | 1       | 4273.5300 | 0.0021      |
| 4    | 3      | 1      | 3     | 3       | 0       | 4593.5350 | 0.0051      |
| 5    | 3      | 2      | 4     | 3       | 1       | 5854.7611 | 0.0166      |
| 6    | 3      | 3      | 5     | 3       | 2       | 6932.2149 | -0.0041     |
| 5    | 4      | 2      | 4     | 4       | 1       | 5439.3737 | -0.0161     |
| 5    | 4      | 1      | 4     | 4       | 0       | 5627.7836 | -0.0032     |
| 6    | 4      | 2      | 5     | 4       | 1       | 6977.5309 | 0.0059      |
| 7    | 4      | 4      | 6     | 4       | 3       | 7440.3985 | -0.0083     |
| 3    | 0      | 3      | 2     | 1       | 2       | 2567.3342 | 0.0097      |
| 4    | 0      | 4      | 3     | 1       | 3       | 3345.0075 | 0.0000      |
| 6    | 0      | 6      | 5     | 1       | 5       | 4861.2106 | 0.0011      |
| 7    | 0      | 7      | 6     | 1       | 6       | 5616.8412 | -0.0087     |
| 8    | 0      | 8      | 7     | 1       | 7       | 6372.4148 | 0.0035      |
| 9    | 0      | 9      | 8     | 1       | 8       | 7127.9730 | 0.0033      |
| 10   | 0      | 10     | 9     | 1       | 9       | 7883.5280 | -0.0041     |
| 3    | 1      | 3      | 2     | 0       | 2       | 2623.1612 | 0.0088      |
| 4    | 1      | 4      | 3     | 0       | 3       | 3356.3508 | 0.0055      |
| 6    | 1      | 6      | 5     | 0       | 5       | 4861.5134 | 0.0073      |
| 8    | 1      | 8      | 7     | 0       | 7       | 6372.4148 | -0.0024     |
| 9    | 1      | 9      | 8     | 0       | 8       | 7127.9729 | 0.0024      |
| 3    | 2      | 2      | 2     | 1       | 1       | 3493.0588 | 0.0131      |
| 4    | 2      | 3      | 3     | 1       | 2       | 4140.3995 | 0.0077      |
| 5    | 2      | 4      | 4     | 1       | 3       | 4805.7021 | -0.0050     |
| 6    | 2      | 5      | 5     | 1       | 4       | 5528.2699 | -0.0129     |
| 4    | 1      | 3      | 3     | 2       | 2       | 3870.1374 | -0.0087     |
| 9    | 1      | 8      | 8     | 2       | 7       | 7784.0000 | 0.0143      |
| 6    | 2      | 4      | 5     | 3       | 3       | 6045.6628 | 0.0092      |
| 5    | 3      | 3      | 4     | 2       | 2       | 5760.2396 | 0.0052      |
| 6    | 3      | 4      | 5     | 2       | 3       | 6334.1659 | -0.0156     |
| 4    | 4      | 1      | 3     | 3       | 0       | 5991.9216 | 0.0100      |
| 5    | 4      | 2      | 4     | 3       | 1       | 6837.7651 | -0.0064     |

|   |   |   |   |   |   |           |         |
|---|---|---|---|---|---|-----------|---------|
| 5 | 5 | 1 | 4 | 4 | 0 | 7598.1032 | -0.0011 |
| 5 | 5 | 0 | 4 | 4 | 1 | 7641.0063 | 0.0064  |
| 3 | 2 | 1 | 2 | 1 | 2 | 4884.3817 | 0.0025  |
| 4 | 3 | 1 | 3 | 2 | 2 | 6143.0570 | -0.0017 |

**Table S21.** Experimental transition frequencies ( $\nu$ /MHz) and obs-calc. values ( $\Delta\nu$ /MHz) of  $^{18}\text{O}$ -3 isotopologues of  $\text{enol}_{\text{H}}\text{-}2\text{W}_{\text{OH}}$ .

| $J$ | $K_a'$ | $K_c'$ | $J''$ | $K_a''$ | $K_c''$ | $\nu$     | $\Delta\nu$ |
|-----|--------|--------|-------|---------|---------|-----------|-------------|
| 7   | 0      | 7      | 6     | 0       | 6       | 5508.1702 | -0.0048     |
| 8   | 0      | 8      | 7     | 0       | 7       | 6248.9633 | -0.0001     |
| 9   | 0      | 9      | 8     | 0       | 8       | 6989.7668 | 0.0013      |
| 10  | 0      | 10     | 9     | 0       | 9       | 7730.5713 | -0.0023     |
| 6   | 0      | 6      | 5     | 0       | 5       | 4767.4594 | 0.0200      |
| 5   | 1      | 5      | 4     | 0       | 4       | 4027.0855 | -0.0113     |
| 6   | 1      | 6      | 5     | 0       | 5       | 4767.4591 | 0.0082      |
| 7   | 1      | 7      | 6     | 0       | 6       | 5508.1701 | -0.0062     |
| 8   | 1      | 8      | 7     | 0       | 7       | 6248.9632 | -0.0003     |
| 9   | 1      | 9      | 8     | 0       | 8       | 6989.7666 | 0.0011      |
| 10  | 1      | 10     | 9     | 0       | 9       | 7730.5711 | -0.0026     |
| 5   | 0      | 5      | 4     | 1       | 4       | 4026.2373 | -0.0099     |
| 6   | 0      | 6      | 5     | 1       | 5       | 4767.3435 | 0.0002      |
| 7   | 0      | 7      | 6     | 1       | 6       | 5508.1701 | 0.0067      |
| 8   | 0      | 8      | 7     | 1       | 7       | 6248.9632 | 0.0012      |
| 9   | 0      | 9      | 8     | 1       | 8       | 6989.7666 | 0.0012      |
| 10  | 0      | 10     | 9     | 1       | 9       | 7730.5711 | -0.0025     |
| 7   | 0      | 7      | 6     | 0       | 6       | 5508.1702 | -0.0048     |
| 8   | 0      | 8      | 7     | 0       | 7       | 6248.9633 | -0.0001     |
| 9   | 0      | 9      | 8     | 0       | 8       | 6989.7668 | 0.0013      |
| 10  | 0      | 10     | 9     | 0       | 9       | 7730.5713 | -0.0023     |
| 6   | 0      | 6      | 5     | 0       | 5       | 4767.4594 | 0.0200      |
| 5   | 1      | 5      | 4     | 0       | 4       | 4027.0855 | -0.0113     |
| 6   | 1      | 6      | 5     | 0       | 5       | 4767.4591 | 0.0082      |
| 7   | 1      | 7      | 6     | 0       | 6       | 5508.1701 | -0.0062     |
| 8   | 1      | 8      | 7     | 0       | 7       | 6248.9632 | -0.0003     |
| 9   | 1      | 9      | 8     | 0       | 8       | 6989.7666 | 0.0011      |
| 10  | 1      | 10     | 9     | 0       | 9       | 7730.5711 | -0.0026     |
| 5   | 0      | 5      | 4     | 1       | 4       | 4026.2373 | -0.0099     |
| 6   | 0      | 6      | 5     | 1       | 5       | 4767.3435 | 0.0002      |
| 7   | 0      | 7      | 6     | 1       | 6       | 5508.1701 | 0.0067      |
| 8   | 0      | 8      | 7     | 1       | 7       | 6248.9632 | 0.0012      |
| 9   | 0      | 9      | 8     | 1       | 8       | 6989.7666 | 0.0012      |
| 10  | 0      | 10     | 9     | 1       | 9       | 7730.5711 | -0.0025     |

**Table S22.** Experimental transition frequencies ( $\nu$ /MHz) and obs-calc. values ( $\Delta\nu$ /MHz) of  $^{18}\text{O}$ -4 isotopologues of  $\text{enol}_{\text{H}}\text{-}2\text{W}_{\text{OH}}$ .

| $J$ | $K_a'$ | $K_c'$ | $J''$ | $K_a''$ | $K_c''$ | $\nu$     | $\Delta\nu$ |
|-----|--------|--------|-------|---------|---------|-----------|-------------|
| 3   | 1      | 3      | 2     | 0       | 2       | 2580.6026 | 0.0001      |
| 4   | 1      | 4      | 3     | 0       | 3       | 3297.9277 | 0.0012      |
| 5   | 1      | 5      | 4     | 0       | 4       | 4033.9374 | -0.0052     |
| 6   | 1      | 6      | 5     | 0       | 5       | 4774.7188 | 0.0007      |
| 8   | 1      | 8      | 7     | 0       | 7       | 6258.3189 | -0.0026     |
| 9   | 1      | 9      | 8     | 0       | 8       | 7000.2454 | -0.0009     |

|    |   |    |   |   |   |           |         |
|----|---|----|---|---|---|-----------|---------|
| 10 | 1 | 10 | 9 | 0 | 9 | 7742.1739 | -0.0051 |
| 4  | 0 | 4  | 3 | 1 | 3 | 3284.3271 | 0.0029  |
| 5  | 0 | 5  | 4 | 1 | 4 | 4031.4796 | -0.0017 |
| 6  | 0 | 6  | 5 | 1 | 5 | 4774.3218 | 0.0076  |
| 8  | 0 | 8  | 7 | 1 | 7 | 6258.3199 | 0.0076  |
| 9  | 0 | 9  | 8 | 1 | 8 | 7000.2413 | -0.0037 |
| 10 | 0 | 10 | 9 | 1 | 9 | 7742.1819 | 0.0031  |
| 3  | 0 | 3  | 2 | 0 | 2 | 2569.1162 | 0.0045  |
| 4  | 0 | 4  | 3 | 0 | 3 | 3295.8077 | -0.0072 |
| 5  | 0 | 5  | 4 | 0 | 4 | 4033.5933 | 0.0004  |
| 8  | 0 | 8  | 7 | 0 | 7 | 6258.3198 | -0.0006 |
| 9  | 0 | 9  | 8 | 0 | 8 | 7000.2413 | -0.0048 |
| 10 | 0 | 10 | 9 | 0 | 9 | 7742.1819 | 0.0030  |
| 5  | 1 | 5  | 4 | 1 | 4 | 4031.8262 | -0.0048 |
| 8  | 1 | 8  | 7 | 1 | 7 | 6258.3198 | 0.0063  |
| 9  | 1 | 9  | 8 | 1 | 8 | 7000.2413 | -0.0039 |
| 10 | 1 | 10 | 9 | 1 | 9 | 7742.1818 | 0.0030  |

**Table S23.** Experimental transition frequencies ( $\nu$ /MHz) and obs-calc. values ( $\Delta\nu$ /MHz) of D-5 isotopologues of enol<sub>H</sub>-2W<sub>OH</sub>.

| $J'$ | $K_a'$ | $K_c'$ | $J''$ | $K_a''$ | $K_c''$ | $\nu$     | $\Delta\nu$ |
|------|--------|--------|-------|---------|---------|-----------|-------------|
| 4    | 0      | 4      | 3     | 1       | 3       | 3331.8386 | 0.0004      |
| 5    | 0      | 5      | 4     | 1       | 4       | 4089.1270 | -0.0003     |
| 6    | 0      | 6      | 5     | 1       | 5       | 4842.5066 | 0.0022      |
| 7    | 0      | 7      | 6     | 1       | 6       | 5595.2071 | -0.0068     |
| 8    | 0      | 8      | 7     | 1       | 7       | 6347.8401 | 0.0045      |
| 9    | 0      | 9      | 8     | 1       | 8       | 7100.4571 | 0.0019      |
| 7    | 1      | 7      | 6     | 1       | 6       | 5595.2071 | -0.0129     |
| 8    | 1      | 8      | 7     | 1       | 7       | 6347.8403 | 0.0038      |
| 9    | 1      | 9      | 8     | 1       | 8       | 7100.4568 | 0.0015      |
| 5    | 0      | 5      | 4     | 0       | 4       | 4090.9443 | 0.0009      |
| 7    | 0      | 7      | 6     | 0       | 6       | 5595.2580 | 0.0011      |
| 8    | 0      | 8      | 7     | 0       | 7       | 6347.8403 | -0.0015     |
| 9    | 0      | 9      | 8     | 0       | 8       | 7100.4568 | 0.0008      |
| 5    | 1      | 5      | 4     | 0       | 4       | 4091.2300 | -0.0018     |
| 6    | 1      | 6      | 5     | 0       | 5       | 4842.8490 | 0.0130      |
| 7    | 1      | 7      | 6     | 0       | 6       | 5595.2580 | -0.0050     |
| 8    | 1      | 8      | 7     | 0       | 7       | 6347.8403 | -0.0023     |
| 9    | 1      | 9      | 8     | 0       | 8       | 7100.4568 | 0.0006      |

**Table S24.** Experimental transition frequencies ( $\nu$ /MHz) and obs-calc. values ( $\Delta\nu$ /MHz) of D-6 isotopologues of enol<sub>H</sub>-2W<sub>OH</sub>.

| $J'$ | $K_a'$ | $K_c'$ | $J''$ | $K_a''$ | $K_c''$ | $\nu$     | $\Delta\nu$ |
|------|--------|--------|-------|---------|---------|-----------|-------------|
| 4    | 1      | 4      | 3     | 0       | 3       | 3337.5691 | -0.0025     |
| 5    | 1      | 5      | 4     | 0       | 4       | 4084.7589 | 0.0023      |
| 6    | 1      | 6      | 5     | 0       | 5       | 4835.4886 | 0.0171      |
| 8    | 1      | 8      | 7     | 0       | 7       | 6338.2507 | -0.0036     |
| 9    | 1      | 9      | 8     | 0       | 8       | 7089.7260 | 0.0041      |
| 10   | 1      | 10     | 9     | 0       | 9       | 7841.1938 | -0.0015     |
| 4    | 0      | 4      | 3     | 1       | 3       | 3328.0263 | -0.0018     |
| 5    | 0      | 5      | 4     | 1       | 4       | 4083.2225 | 0.0014      |
| 6    | 0      | 6      | 5     | 1       | 5       | 4835.2477 | 0.0004      |

|    |   |    |   |   |   |           |         |
|----|---|----|---|---|---|-----------|---------|
| 7  | 0 | 7  | 6 | 1 | 6 | 5586.7678 | -0.0102 |
| 8  | 0 | 8  | 7 | 1 | 7 | 6338.2507 | 0.0005  |
| 9  | 0 | 9  | 8 | 1 | 8 | 7089.7260 | 0.0046  |
| 10 | 0 | 10 | 9 | 1 | 9 | 7841.1938 | -0.0015 |
| 7  | 1 | 7  | 6 | 1 | 6 | 5586.7678 | -0.0138 |
| 8  | 1 | 8  | 7 | 1 | 7 | 6338.2507 | 0.0001  |
| 9  | 1 | 9  | 8 | 1 | 8 | 7089.7255 | 0.0040  |
| 10 | 1 | 10 | 9 | 1 | 9 | 7841.1937 | -0.0016 |
| 5  | 0 | 5  | 4 | 0 | 4 | 4084.5587 | -0.0010 |
| 7  | 0 | 7  | 6 | 0 | 6 | 5586.8086 | 0.0034  |
| 8  | 0 | 8  | 7 | 0 | 7 | 6338.2507 | -0.0031 |
| 9  | 0 | 9  | 8 | 0 | 8 | 7089.7259 | 0.0040  |
| 10 | 0 | 10 | 9 | 0 | 9 | 7841.1941 | -0.0012 |

**Table S25.** Experimental transition frequencies ( $\nu$ /MHz) and obs-calc. values ( $\Delta\nu$ /MHz) of D-7 isotopologues of enol<sub>H</sub>-2W<sub>OH</sub>.

| $J'$ | $K_a'$ | $K_c'$ | $J''$ | $K_a''$ | $K_c''$ | $\nu$     | $\Delta\nu$ |
|------|--------|--------|-------|---------|---------|-----------|-------------|
| 8    | 1      | 8      | 7     | 0       | 7       | 6291.2198 | 0.0051      |
| 9    | 1      | 9      | 8     | 0       | 8       | 7037.0959 | -0.0043     |
| 6    | 0      | 6      | 5     | 1       | 5       | 4799.4024 | -0.0123     |
| 7    | 0      | 7      | 6     | 1       | 6       | 5545.3316 | 0.0022      |
| 8    | 0      | 8      | 7     | 1       | 7       | 6291.2194 | 0.0069      |
| 9    | 0      | 9      | 8     | 1       | 8       | 7037.0962 | -0.0038     |
| 8    | 0      | 8      | 7     | 0       | 7       | 6291.2194 | 0.0050      |
| 9    | 0      | 9      | 8     | 0       | 8       | 7037.0961 | -0.0040     |
| 5    | 1      | 5      | 4     | 1       | 4       | 4053.2841 | 0.0022      |
| 6    | 1      | 5      | 5     | 1       | 4       | 5452.9600 | 0.0000      |
| 7    | 1      | 7      | 6     | 1       | 6       | 5545.3316 | 0.0003      |
| 8    | 1      | 8      | 7     | 1       | 7       | 6291.2194 | 0.0067      |
| 9    | 1      | 9      | 8     | 1       | 8       | 7037.0961 | -0.0038     |

**Table S26.** Experimental transition frequencies ( $\nu$ /MHz) and obs-calc. values ( $\Delta\nu$ /MHz) of D-8 isotopologues of enol<sub>H</sub>-2W<sub>OH</sub>.

| $J'$ | $K_a'$ | $K_c'$ | $J''$ | $K_a''$ | $K_c''$ | $\nu$     | $\Delta\nu$ |
|------|--------|--------|-------|---------|---------|-----------|-------------|
| 9    | 1      | 9      | 8     | 0       | 8       | 7031.2884 | 0.0023      |
| 8    | 1      | 8      | 7     | 0       | 7       | 6286.0198 | -0.0102     |
| 7    | 1      | 7      | 6     | 0       | 6       | 5540.8163 | 0.0027      |
| 6    | 1      | 6      | 5     | 0       | 5       | 4795.7689 | -0.0074     |
| 9    | 1      | 9      | 8     | 1       | 8       | 7031.2883 | 0.0034      |
| 8    | 1      | 8      | 7     | 1       | 7       | 6286.0198 | -0.0022     |
| 7    | 1      | 7      | 6     | 1       | 6       | 5540.7620 | 0.0026      |
| 6    | 1      | 6      | 5     | 1       | 5       | 4795.4335 | 0.0063      |
| 9    | 0      | 9      | 8     | 1       | 8       | 7031.2884 | 0.0036      |
| 8    | 0      | 8      | 7     | 1       | 7       | 6286.0198 | -0.0010     |
| 7    | 0      | 7      | 6     | 1       | 6       | 5540.7537 | 0.0023      |
| 6    | 0      | 6      | 5     | 1       | 5       | 4795.3670 | -0.0061     |
| 6    | 0      | 6      | 5     | 0       | 5       | 4795.7302 | 0.0080      |
| 7    | 0      | 7      | 6     | 0       | 6       | 5540.8079 | 0.0024      |
| 8    | 0      | 8      | 7     | 0       | 7       | 6286.0198 | -0.0091     |
| 9    | 0      | 9      | 8     | 0       | 8       | 7031.2884 | 0.0024      |



**Table S27.** Experimental transition frequencies ( $\nu$ /MHz) and obs-calc. values ( $\Delta\nu$ /MHz) of D-9 isotopologues of enol<sub>H</sub>-2W<sub>OH</sub>.

| $J'$ | $K_a'$ | $K_c'$ | $J''$ | $K_a''$ | $K_c''$ | $\nu$     | $\Delta\nu$ |
|------|--------|--------|-------|---------|---------|-----------|-------------|
| 5    | 1      | 5      | 4     | 0       | 4       | 4070.1395 | -0.0078     |
| 7    | 1      | 7      | 6     | 0       | 6       | 5566.5551 | 0.0164      |
| 8    | 1      | 8      | 7     | 0       | 7       | 6315.2336 | -0.0073     |
| 9    | 1      | 9      | 8     | 0       | 8       | 7063.9745 | 0.0013      |
| 10   | 1      | 10     | 9     | 0       | 9       | 7812.7140 | -0.0020     |
| 6    | 0      | 6      | 5     | 1       | 5       | 4817.6918 | 0.0067      |
| 7    | 0      | 7      | 6     | 1       | 6       | 5566.5031 | 0.0057      |
| 8    | 0      | 8      | 7     | 1       | 7       | 6315.2337 | -0.0015     |
| 9    | 0      | 9      | 8     | 1       | 8       | 7063.9749 | 0.0024      |
| 5    | 0      | 5      | 4     | 0       | 4       | 4069.9008 | 0.0040      |
| 8    | 0      | 8      | 7     | 0       | 7       | 6315.2337 | -0.0064     |
| 9    | 0      | 9      | 8     | 0       | 8       | 7063.9751 | 0.0019      |
| 10   | 0      | 10     | 9     | 0       | 9       | 7812.7145 | -0.0015     |
| 5    | 1      | 5      | 4     | 1       | 4       | 4068.5160 | -0.0105     |
| 7    | 1      | 7      | 6     | 1       | 6       | 5566.5041 | 0.0017      |
| 8    | 1      | 8      | 7     | 1       | 7       | 6315.2341 | -0.0018     |
| 9    | 1      | 9      | 8     | 1       | 8       | 7063.9739 | 0.0013      |
| 10   | 1      | 10     | 9     | 1       | 9       | 7812.7135 | -0.0025     |
| 5    | 1      | 5      | 4     | 0       | 4       | 4070.1395 | -0.0078     |
| 7    | 1      | 7      | 6     | 0       | 6       | 5566.5551 | 0.0164      |
| 8    | 1      | 8      | 7     | 0       | 7       | 6315.2336 | -0.0073     |
| 9    | 1      | 9      | 8     | 0       | 8       | 7063.9745 | 0.0013      |
| 10   | 1      | 10     | 9     | 0       | 9       | 7812.7140 | -0.0020     |
| 6    | 0      | 6      | 5     | 1       | 5       | 4817.6918 | 0.0067      |
| 7    | 0      | 7      | 6     | 1       | 6       | 5566.5031 | 0.0057      |
| 8    | 0      | 8      | 7     | 1       | 7       | 6315.2337 | -0.0015     |
| 9    | 0      | 9      | 8     | 1       | 8       | 7063.9749 | 0.0024      |
| 5    | 0      | 5      | 4     | 0       | 4       | 4069.9008 | 0.0040      |
| 8    | 0      | 8      | 7     | 0       | 7       | 6315.2337 | -0.0064     |
| 9    | 0      | 9      | 8     | 0       | 8       | 7063.9751 | 0.0019      |
| 10   | 0      | 10     | 9     | 0       | 9       | 7812.7145 | -0.0015     |
| 5    | 1      | 5      | 4     | 1       | 4       | 4068.5160 | -0.0105     |
| 7    | 1      | 7      | 6     | 1       | 6       | 5566.5041 | 0.0017      |
| 8    | 1      | 8      | 7     | 1       | 7       | 6315.2341 | -0.0018     |
| 9    | 1      | 9      | 8     | 1       | 8       | 7063.9739 | 0.0013      |
| 10   | 1      | 10     | 9     | 1       | 9       | 7812.7135 | -0.0025     |

**Table S28.** Experimental transition frequencies ( $\nu$ /MHz) and obs-calc. values ( $\Delta\nu$ /MHz) of enol<sub>F</sub>-2W<sub>CH</sub>.

| $J'$ | $K_a'$ | $K_c'$ | $J''$ | $K_a''$ | $K_c''$ | $\nu$     | $\Delta\nu$ |
|------|--------|--------|-------|---------|---------|-----------|-------------|
| 3    | 0      | 3      | 2     | 0       | 2       | 2280.4668 | -0.0040     |
| 4    | 0      | 4      | 3     | 0       | 3       | 3040.5575 | -0.0007     |
| 5    | 0      | 5      | 4     | 0       | 4       | 3800.5880 | 0.0019      |
| 6    | 0      | 6      | 5     | 0       | 5       | 4560.5349 | -0.0047     |
| 7    | 0      | 7      | 6     | 0       | 6       | 5320.3918 | -0.0122     |
| 8    | 0      | 8      | 7     | 0       | 7       | 6080.1467 | -0.0175     |
| 9    | 0      | 9      | 8     | 0       | 8       | 6839.7896 | -0.0162     |
| 3    | 1      | 3      | 2     | 1       | 2       | 2274.8056 | 0.0136      |
| 3    | 1      | 2      | 2     | 1       | 1       | 2286.2081 | -0.0093     |
| 4    | 1      | 4      | 3     | 1       | 3       | 3033.0323 | 0.0105      |

|    |   |   |   |   |   |           |         |
|----|---|---|---|---|---|-----------|---------|
| 4  | 1 | 3 | 3 | 1 | 2 | 3048.2473 | -0.0083 |
| 5  | 1 | 5 | 4 | 1 | 4 | 3791.2360 | 0.0138  |
| 5  | 1 | 4 | 4 | 1 | 3 | 3810.2596 | -0.0047 |
| 6  | 1 | 6 | 5 | 1 | 5 | 4549.3950 | 0.0089  |
| 6  | 1 | 5 | 5 | 1 | 4 | 4572.2278 | -0.0083 |
| 7  | 1 | 7 | 6 | 1 | 6 | 5307.5028 | -0.0034 |
| 7  | 1 | 6 | 6 | 1 | 5 | 5334.1625 | -0.0010 |
| 8  | 1 | 8 | 7 | 1 | 7 | 6065.5650 | -0.0104 |
| 8  | 1 | 7 | 7 | 1 | 6 | 6096.0505 | 0.0115  |
| 9  | 1 | 9 | 8 | 1 | 8 | 6823.5673 | -0.0192 |
| 6  | 2 | 5 | 5 | 2 | 4 | 4560.8538 | 0.0075  |
| 6  | 2 | 4 | 5 | 2 | 3 | 4561.2164 | 0.0183  |
| 7  | 2 | 6 | 6 | 2 | 5 | 5320.8994 | 0.0108  |
| 7  | 2 | 5 | 6 | 2 | 4 | 5321.4570 | 0.0056  |
| 8  | 2 | 7 | 7 | 2 | 6 | 6080.8828 | -0.0026 |
| 8  | 2 | 6 | 7 | 2 | 5 | 6081.7268 | -0.0027 |
| 9  | 2 | 8 | 8 | 2 | 7 | 6840.8386 | 0.0085  |
| 9  | 2 | 7 | 8 | 2 | 6 | 6842.0427 | 0.0073  |
| 10 | 2 | 9 | 9 | 2 | 8 | 7600.7252 | 0.0089  |
| 10 | 2 | 8 | 9 | 2 | 7 | 7602.3832 | 0.0106  |
| 2  | 1 | 1 | 1 | 0 | 1 | 2607.9143 | 0.0122  |
| 3  | 1 | 2 | 2 | 0 | 2 | 3373.7874 | 0.0066  |
| 4  | 1 | 3 | 3 | 0 | 3 | 4141.5602 | -0.0054 |
| 5  | 1 | 4 | 4 | 0 | 4 | 4911.2627 | -0.0089 |
| 6  | 1 | 5 | 5 | 0 | 5 | 5682.9126 | -0.0090 |
| 7  | 1 | 6 | 6 | 0 | 6 | 6456.5417 | -0.0036 |
| 8  | 1 | 7 | 7 | 0 | 7 | 7232.1886 | 0.0083  |

**Table S29.** Experimental transition frequencies ( $\nu$ /MHz) and obs-calc. values ( $\Delta\nu$ /MHz) of enol<sub>F</sub>-3W<sub>CH</sub>.

| $J$ | $K_a'$ | $K_c'$ | $J''$ | $K_a''$ | $K_c''$ | $\nu$     | $\Delta\nu$ |
|-----|--------|--------|-------|---------|---------|-----------|-------------|
| 5   | 0      | 5      | 4     | 0       | 4       | 2902.5370 | 0.0046      |
| 6   | 0      | 6      | 5     | 0       | 5       | 3481.2625 | 0.0078      |
| 7   | 0      | 7      | 6     | 0       | 6       | 4059.0250 | 0.0004      |
| 8   | 0      | 8      | 7     | 0       | 7       | 4635.7250 | 0.0135      |
| 9   | 0      | 9      | 8     | 0       | 8       | 5211.2062 | -0.0016     |
| 10  | 0      | 10     | 9     | 0       | 9       | 5785.4250 | -0.0121     |
| 11  | 0      | 11     | 10    | 0       | 10      | 6358.3750 | 0.0127      |
| 12  | 0      | 12     | 11    | 0       | 11      | 6929.9875 | -0.0041     |
| 13  | 0      | 13     | 12    | 0       | 12      | 7500.3750 | -0.0051     |
| 4   | 1      | 4      | 3     | 1       | 3       | 2296.3963 | 0.0013      |
| 5   | 1      | 5      | 4     | 1       | 4       | 2870.1910 | 0.0020      |
| 5   | 1      | 4      | 4     | 1       | 3       | 2939.9411 | -0.0050     |
| 6   | 1      | 6      | 5     | 1       | 5       | 3443.7921 | 0.0057      |
| 6   | 1      | 5      | 5     | 1       | 4       | 3527.4654 | 0.0069      |
| 7   | 1      | 7      | 6     | 1       | 6       | 4017.1534 | -0.0008     |
| 7   | 1      | 6      | 6     | 1       | 5       | 4114.7097 | 0.0099      |
| 8   | 1      | 8      | 7     | 1       | 7       | 4590.2721 | 0.0096      |
| 8   | 1      | 7      | 7     | 1       | 6       | 4701.6137 | -0.0019     |
| 9   | 1      | 9      | 8     | 1       | 8       | 5163.0765 | -0.0090     |
| 9   | 1      | 8      | 8     | 1       | 7       | 5288.1393 | -0.0079     |
| 10  | 1      | 10     | 9     | 1       | 9       | 5735.5914 | -0.0098     |
| 10  | 1      | 9      | 9     | 1       | 8       | 5874.2234 | -0.0076     |

|    |   |    |    |   |    |           |         |
|----|---|----|----|---|----|-----------|---------|
| 11 | 1 | 11 | 10 | 1 | 10 | 6307.7885 | -0.0037 |
| 11 | 1 | 10 | 10 | 1 | 9  | 6459.7975 | -0.0005 |
| 12 | 1 | 12 | 11 | 1 | 11 | 6879.6506 | 0.0051  |
| 12 | 1 | 11 | 11 | 1 | 10 | 7044.7739 | 0.0007  |
| 13 | 1 | 13 | 12 | 1 | 12 | 7451.1454 | -0.0073 |
| 13 | 1 | 12 | 12 | 1 | 11 | 7629.0713 | -0.0047 |
| 5  | 2 | 3  | 4  | 2 | 2  | 2908.6247 | -0.0401 |
| 6  | 2 | 5  | 5  | 2 | 4  | 3486.1889 | -0.0034 |
| 6  | 2 | 4  | 5  | 2 | 3  | 3491.8703 | 0.0088  |
| 7  | 2 | 6  | 6  | 2 | 5  | 4066.7990 | 0.0010  |
| 7  | 2 | 5  | 6  | 2 | 4  | 4075.8286 | -0.0069 |
| 8  | 2 | 7  | 7  | 2 | 6  | 4647.2074 | 0.0001  |
| 8  | 2 | 6  | 7  | 2 | 5  | 4660.6758 | -0.0123 |
| 9  | 2 | 8  | 8  | 2 | 7  | 5227.3877 | -0.0047 |
| 9  | 2 | 7  | 8  | 2 | 6  | 5246.4910 | -0.0063 |
| 10 | 2 | 9  | 9  | 2 | 8  | 5807.3295 | 0.0038  |
| 10 | 2 | 8  | 9  | 2 | 7  | 5833.3130 | 0.0037  |
| 11 | 2 | 10 | 10 | 2 | 9  | 6386.9702 | -0.0101 |
| 11 | 2 | 9  | 10 | 2 | 8  | 6421.1215 | -0.0094 |
| 12 | 2 | 11 | 11 | 2 | 10 | 6966.3285 | -0.0008 |
| 12 | 2 | 10 | 11 | 2 | 9  | 7009.9197 | -0.0030 |
| 13 | 2 | 12 | 12 | 2 | 11 | 7545.3461 | -0.0007 |
| 13 | 2 | 11 | 12 | 2 | 10 | 7599.5956 | -0.0019 |
| 10 | 3 | 8  | 9  | 3 | 7  | 5814.6451 | 0.0096  |
| 10 | 3 | 7  | 9  | 3 | 6  | 5815.5877 | 0.0180  |
| 11 | 3 | 9  | 10 | 3 | 8  | 6396.6379 | 0.0303  |
| 11 | 3 | 8  | 10 | 3 | 7  | 6398.1186 | -0.0035 |
| 12 | 3 | 10 | 11 | 3 | 9  | 6978.6898 | 0.0183  |
| 12 | 3 | 9  | 11 | 3 | 8  | 6981.0265 | 0.0064  |
| 13 | 3 | 11 | 12 | 3 | 10 | 7560.8145 | 0.0013  |
| 13 | 3 | 10 | 12 | 3 | 9  | 7564.3172 | -0.0048 |

## References

- (1) Richardson, J. O. Microcanonical and Thermal Instanton Rate Theory for Chemical Reactions at All Temperatures. *Faraday Discuss.* **2016**, *195*, 49-67.
- (2) Fang, W.; Winter, P.; Richardson, J. O. Microcanonical Tunneling Rates from Density-of-States Instanton Theory. *J. Chem. Theory Comput.* **2020**, *17*, 40-55.
- (3) Frisch, M. J.; Trucks, G. W.; Schlegel, H. B.; Scuseria, G. E.; Robb, M. A.; Cheeseman, J. R.; Scalmani, G.; Barone, V.; Mennucci, B.; Petersson, G. A.; Nakatsuji, H.; Caricato, M.; Li, X.; Hratchian, H. P.; Izmaylov, A. F.; Bloino, J.; Zheng, G.; Sonnenberg, J. L.; Hada, M.; Ehara, M.; Toyota, K.; Fukuda, R.; Hasegawa, J.; Ishida, M.; Nakajima, T.; Honda, Y.; Kitao, O.; Nakai, H.; Vreven, T.; Montgomery, J. A.; Peralta, J. E.; Ogliaro, F.; Bearpark, M.; Heyd, J. J.; Brothers, E.; Kudin, K. N.; Staroverov, V. N.; Kobayashi, R.; Normand, J.; Raghavachari, K.; Rendell, A.; Burant, J. C.; Iyengar, S. S.; Tomasi, J.; Cossi, M.; Rega, N.; Millam, J. M.; Klene, M.; Knox, J. E.; Cross, J. B.; Bakken, V.; Adamo, C.; Jaramillo, J.; Gomperts, R.; Stratmann, R. E.; Yazyev, O.; Austin, A.; Cammi, R.; Pomelli, C.; Ochterski, J. W.; Martin, R. L.; Morokuma, K.; Zakrzewski, V. G.; Voth, G. A.; Salvador, P.; Dannenberg, J. J.; Dapprich, S.; Daniels, A. D.; Farkas, O.; Foresman, J. B.; Ortiz, J. V.; Cioslowski, J.; Fox, D. J. Gaussian 09, Revision B.01. Gaussian Inc., Wallingford CT, **2009**, 201.
- (4) Barone, V. Anharmonic Vibrational Properties by a Fully Automated Second-Order Perturbative Approach. *J. Chem. Phys.* **2005**, *122*, 14108-14108.
